# Supplementary material
Source: PubMed Central journal article supplement (PMC4130221)
Supplement: NIHMS611708-supplement-Supplementary_file.pdf [file NIHMS611708-supplement-Supplementary_file.pdf]

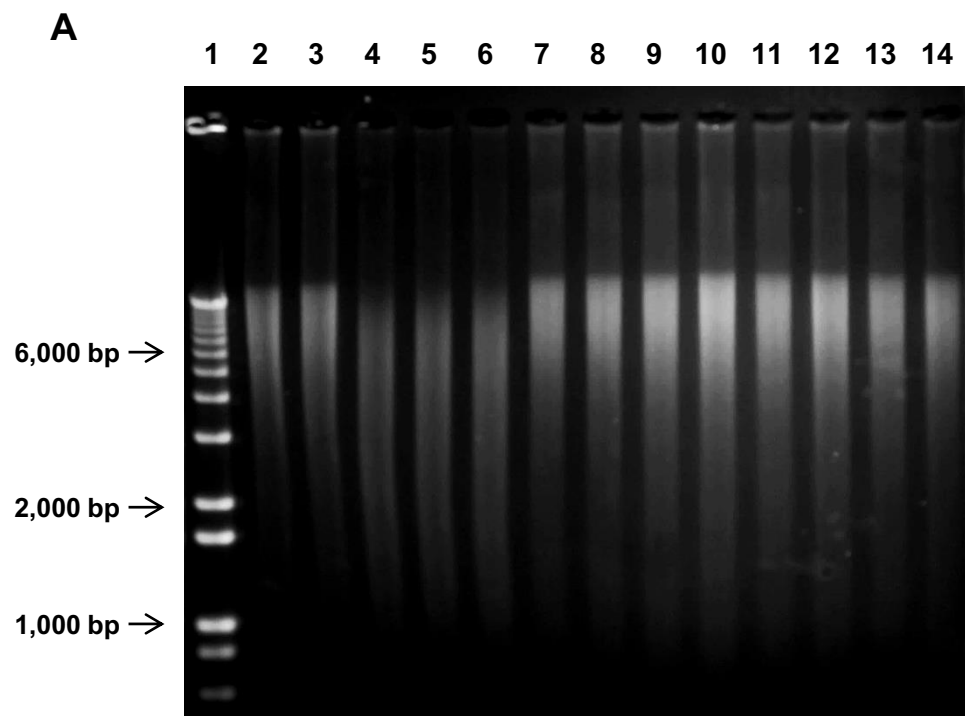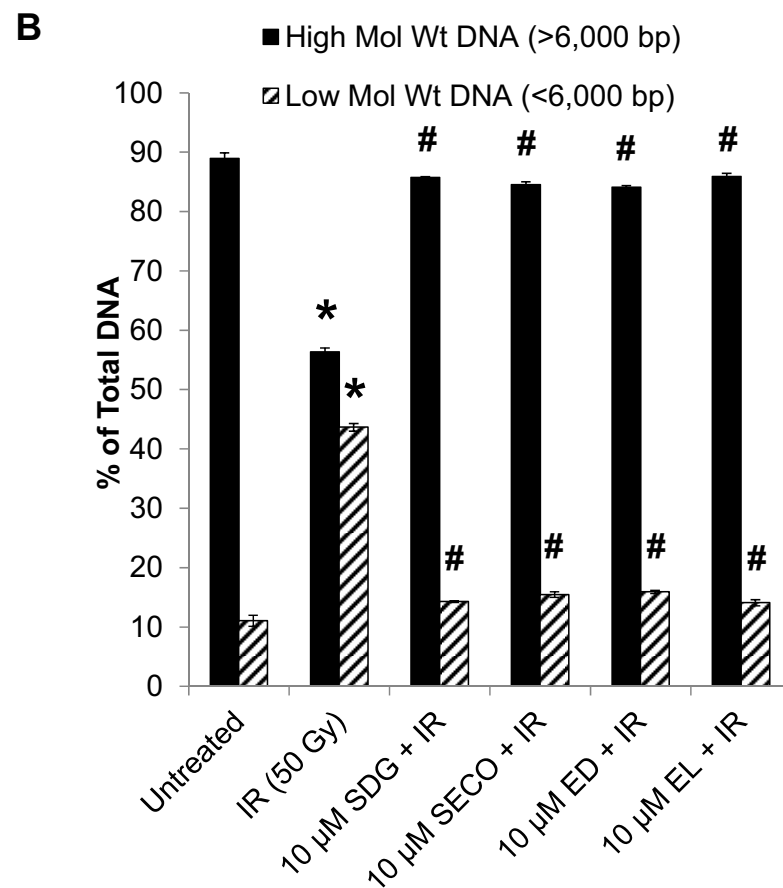

**Supplemental Figure 1**

**Supplemental Figure 1:** Effect of SDG, SECO, ED and EL on  $\gamma$  radiation-induced calf thymus DNA fragmentation.

All samples were exposed to a  $\gamma$  radiation dose of 50 Gy. SDG, SECO, ED and EL were used at 10  $\mu$ M concentration. In Figure A - representative agarose gel scans of calf thymus DNA after exposure to 50 Gy in the presence of 10  $\mu$ M SDG, SECO, ED and EL are shown. Lane 1 – 1 kb DNA standard ladder, lanes 2 and 3 – untreated DNA, lanes 4, 5 and 6 – IR 50 Gy, lanes 7 and 8 – SDG, lanes 9 and 10- SECO, lanes 11 and 12- ED, and lanes 13 and 14 - EL. In Figure B - High and Low molecular wt DNA forms are presented as percent of total DNA. For each condition, all samples were run in duplicates. The data is presented as mean  $\pm$  standard deviation.  $P < 0.05$  was considered significant. \* shows the significant difference as compared to untreated DNA. # shows the significant difference as compared to samples exposed to 50 Gy alone.
